# Supplementary material
Source: publisher site journal article supplement (https://www.dovepress.com/article/377678)
Supplement: Supplementary file 1 [file get_supplementary_file.php]

**Supplementary Table 1** The basic function of DPY30 is analyzed by TISIDB

| [GO:0007034 vacuolar transport](http://www.ebi.ac.uk/QuickGO/GTerm?id=GO:0007034) | Biological Process |
| --- | --- |
| [GO:0008213 protein alkylation](http://www.ebi.ac.uk/QuickGO/GTerm?id=GO:0008213) | Biological Process |
| [GO:0016197 endosomal transport](http://www.ebi.ac.uk/QuickGO/GTerm?id=GO:0016197) | Biological Process |
| [GO:0016458 gene silencing](http://www.ebi.ac.uk/QuickGO/GTerm?id=GO:0016458) | Biological Process |
| [GO:0016570 histone modification](http://www.ebi.ac.uk/QuickGO/GTerm?id=GO:0016570) | Biological Process |
| [GO:0016571 histone methylation](http://www.ebi.ac.uk/QuickGO/GTerm?id=GO:0016571) | Biological Process |
| [GO:0018022 peptidyl-lysine methylation](http://www.ebi.ac.uk/QuickGO/GTerm?id=GO:0018022) | Biological Process |
| [GO:0018205 peptidyl-lysine modification](http://www.ebi.ac.uk/QuickGO/GTerm?id=GO:0018205) | Biological Process |
| [GO:0032259 methylation](http://www.ebi.ac.uk/QuickGO/GTerm?id=GO:0032259) | Biological Process |
| [GO:0034968 histone lysine methylation](http://www.ebi.ac.uk/QuickGO/GTerm?id=GO:0034968) | Biological Process |
| [GO:0040029 regulation of gene expression, epigenetic](http://www.ebi.ac.uk/QuickGO/GTerm?id=GO:0040029) | Biological Process |
| [GO:0043414 macromolecule methylation](http://www.ebi.ac.uk/QuickGO/GTerm?id=GO:0043414) | Biological Process |
| [GO:0045814 negative regulation of gene expression, epigenetic](http://www.ebi.ac.uk/QuickGO/GTerm?id=GO:0045814) | Biological Process |
| [GO:0051568 histone H3-K4 methylation](http://www.ebi.ac.uk/QuickGO/GTerm?id=GO:0051568) | Biological Process |
| [GO:0008168 methyltransferase activity](http://www.ebi.ac.uk/QuickGO/GTerm?id=GO:0008168) | Molecular Function |
| [GO:0008170 N-methyltransferase activity](http://www.ebi.ac.uk/QuickGO/GTerm?id=GO:0008170) | Molecular Function |
| [GO:0008276 protein methyltransferase activity](http://www.ebi.ac.uk/QuickGO/GTerm?id=GO:0008276) | Molecular Function |
| [GO:0008757 S-adenosylmethionine-dependent methyltransferase activity](http://www.ebi.ac.uk/QuickGO/GTerm?id=GO:0008757) | Molecular Function |
| [GO:0016278 lysine N-methyltransferase activity](http://www.ebi.ac.uk/QuickGO/GTerm?id=GO:0016278) | Molecular Function |
| [GO:0016279 protein-lysine N-methyltransferase activity](http://www.ebi.ac.uk/QuickGO/GTerm?id=GO:0016279) | Molecular Function |
| [GO:0016741 transferase activity, transferring one-carbon groups](http://www.ebi.ac.uk/QuickGO/GTerm?id=GO:0016741) | Molecular Function |
| [GO:0018024 histone-lysine N-methyltransferase activity](http://www.ebi.ac.uk/QuickGO/GTerm?id=GO:0018024) | Molecular Function |
| [GO:0042054 histone methyltransferase activity](http://www.ebi.ac.uk/QuickGO/GTerm?id=GO:0042054) | Molecular Function |
| [GO:0042800 histone methyltransferase activity (H3-K4 specific)](http://www.ebi.ac.uk/QuickGO/GTerm?id=GO:0042800) | Molecular Function |
| [GO:0008168 methyltransferase activity](http://www.ebi.ac.uk/QuickGO/GTerm?id=GO:0008168) | Molecular Function |
| [GO:0000781 chromosome, telomeric region](http://www.ebi.ac.uk/QuickGO/GTerm?id=GO:0000781) | Cellular Component |
| [GO:0005802 trans-Golgi network](http://www.ebi.ac.uk/QuickGO/GTerm?id=GO:0005802) | Cellular Component |
| [GO:0031984 organelle subcompartment](http://www.ebi.ac.uk/QuickGO/GTerm?id=GO:0031984) | Cellular Component |
| [GO:0034708 methyltransferase complex](http://www.ebi.ac.uk/QuickGO/GTerm?id=GO:0034708) | Cellular Component |
| [GO:0035097 histone methyltransferase complex](http://www.ebi.ac.uk/QuickGO/GTerm?id=GO:0035097) | Cellular Component |
| [GO:0044666 MLL3/4 complex](http://www.ebi.ac.uk/QuickGO/GTerm?id=GO:0044666) | Cellular Component |
| [GO:0048188 Set1C/COMPASS complex](http://www.ebi.ac.uk/QuickGO/GTerm?id=GO:0048188) | Cellular Component |
| [GO:0098687 chromosomal region](http://www.ebi.ac.uk/QuickGO/GTerm?id=GO:0098687) | Cellular Component |
| [GO:0098791 Golgi subcompartment](http://www.ebi.ac.uk/QuickGO/GTerm?id=GO:0098791) | Cellular Component |
| [GO:0000781 chromosome, telomeric region](http://www.ebi.ac.uk/QuickGO/GTerm?id=GO:0000781) | Cellular Component |
